# Supplementary material for: Ambient scalable fabrication of high-performance flexible perovskite solar cells
Source: Royal Society of Chemistry journal article supplement (doi:10.1039/d4ee02925a), 2024-01-01
Supplement: d4ee02925a1.pdf [file d4ee02925a1.pdf]

## Supplementary Information

### **Ambient scalable fabrication of high-performance flexible perovskite solar cells**

Pengchi Liu<sup>†1</sup>, Hui Wang<sup>†2,4</sup>, Tianqi Niu<sup>†1</sup>, Lei Yin<sup>1</sup>, Yachao Du<sup>1</sup>, Lei Lang<sup>1</sup>, Zheng Zhang<sup>1</sup>, Yongchao Tu<sup>1</sup>, Xiujie Liu<sup>1</sup>, Xin Chen<sup>1</sup>, Shuang Wang<sup>1</sup>, Nan Wu<sup>1</sup>, Ru Qin<sup>1</sup>, Likun Wang<sup>2</sup>, Shaoan Yang<sup>2</sup>, Chunfu Zhang<sup>4</sup>, Xu Pan<sup>5</sup>, Shengzhong (Frank) Liu<sup>1,2,3</sup>, Kui Zhao<sup>1,\*</sup>

<sup>1</sup>Key Laboratory of Applied Surface and Colloid Chemistry, National Ministry of Education; Shaanxi Key Laboratory for Advanced Energy Devices. Shaanxi Engineering Lab for Advanced Energy Technology, School of Materials Science and Engineering, Shaanxi Normal University, Xi'an 710119, P. R. China.

<sup>2</sup>Key Laboratory of Photoelectric Conversion and Utilization of Solar Energy, Dalian Institute of Chemical Physics, Chinese Academy of Sciences, Dalian, 116023, Liaoning, China;

<sup>3</sup>Center of Materials Science and Optoelectronics Engineering, University of Chinese Academy of Sciences, Beijing, 100049, P. R. China.

<sup>4</sup>Wide Bandgap Semiconductor Technology Disciplines State Key Laboratory, Shaanxi Joint Key Laboratory of Graphene, School of Microelectronics, Xidian University, Xi'an 710071, China.

<sup>5</sup>Key Laboratory of Photovoltaic and Energy Conservation Material, Institute of Solid-State Physics 8 (ISSP), Hefei Institutes of Physical Science (HIPS), Chinese Academy of Sciences, Hefei 230031, China.

<sup>†</sup> These authors contributed equally.

\* Email: zhaok@snnu.edu.cn

## Experimental Section

**Materials:** Formamidinium iodide (FAI,  $\geq 99.9\%$ ), cesium bromide (CsBr, 98%), methylammonium chloride (MACl,  $\geq 99.9\%$ ), Pb (II) iodide ( $\text{PbI}_2$ ,  $\geq 99.99\%$ ) and 2,2',7,7'-tetrakis(N,N'-di-p-methoxyphenylamine)-9,9'-spirobifluorene (Spiro-OMeTAD) were purchased from Advanced Election Technology Co., Ltd. Ionic liquid 1-butyl-3-methylimidazolium thiocyanate (BPySCN) was brought from Xi'an Polymer Light Technology Cory Co., Ltd. N, N-dimethylformamide (DMF, 99.8%) and N-Methylpyrrolidone (NMP,  $\geq 99.9\%$ ) were obtained from Alfa Aesar. 4-tert-butylpyridine (t-BP, 99%) and lithiumbis(trifluoromethylsulfonyl)imide salt (LiTFSI) were purchased from Sigma-Aldrich. Chlorobenzene (CB, 99.5%) and isopropanol (IPA, 99.5%) were purchased from China National Pharmaceutical Group Corporation.  $\text{SnO}_2$  colloid precursor (tin (iv) oxide, 15% in  $\text{H}_2\text{O}$  colloidal dispersion) was obtained from Alfa Aesar. All chemicals were applied as received without further purification.

**Precursor solution preparation.**  $\text{SnO}_2$  colloidal precursor was diluted with deionized water with a ratio of 1:6. The  $\text{FA}_{0.95}\text{Cs}_{0.05}\text{PbI}_3$  perovskite solution was prepared by dissolving 163.4 mg FAI, 462 mg  $\text{PbI}_2$ , 10.7 mg CsBr, 23.6 mg MACl and BPySCN under different concentrations in 100  $\mu\text{L}$  NMP and 1 mL DMF. The Spiro-OMeTAD solution was prepared by dissolving 90 mg Spiro-OMeTAD in 1 mL CB with 22  $\mu\text{L}$  LiTFSI solution (520 mg in 1 mL ACN), 20  $\mu\text{L}$  Co-TFSI solution (375 mg Co-TFSI in 1 mL ACN) and 36  $\mu\text{L}$  4-tert-butylpyridine.

### Device fabrication

**Fabrication of small-area devices.** Fluorine-doped tin oxide (FTO) glass substrates and indium tin oxide (ITO)-coated flexible PET substrates (ca. 50  $\mu\text{m}$  thick) were cleaned by sequential sonication in a detergent, deionized water, and ethanol, then dried in ovens and treated with ozone plasma before blade-coating. The electron transport layer (ETL), perovskite layer, and hole transport layer (HTL) were all fabricated by blade-coating in ambient conditions. The  $\text{SnO}_2$  ETL was fabricated by blade-coating the diluted solution on the pre-heated substrate at 40  $^\circ\text{C}$  at a speed of 20 mm/s and then annealed at 100  $^\circ\text{C}$  for 30 min. For the perovskite deposition process, the precursor solution was dropped onto a 40  $^\circ\text{C}$  pre-heated substrate and blade-coated at a speed of 20 mm/s. An airflow was applied to the as-casted films for several seconds to accelerate the evaporation of the solvent. Then, perovskite films were transferred to the hotplate and annealed at 100  $^\circ\text{C}$  for 15 min. After depositing the absorber layer, the 2-phenylethanamine hydroiodide (PEAI) layer was fabricated by printing the PEA solution (5.0 mg/ml in IPA) on the 40  $^\circ\text{C}$  pre-heated perovskite layer at a speed of 25 mm/s. The HTL was deposited on the top of perovskite films by blade coating the Spiro-OMeTAD solution at a speed of 20 mm/s. Finally, the 80 nm gold electrode was thermally evaporated under vacuum. A non-refractive mask was employed to determine the active device area of 0.09  $\text{cm}^2$ .

***Fabrication of flexible solar modules.*** The flexible solar module with 30 sub-cells was constructed by P1, P2, and P3 scribing lines with a wavelength of 1064 nm. The etched PET/ITO substrate was pre-patterned for P1 (ca. 200  $\mu\text{m}$  width) and then cleaned with acetone and isopropanol to eliminate the adhesive residue. The subsequent processes for the preparation of  $\text{SnO}_2$ , perovskite, PEAI, and Spiro-OMeTAD layers are the same as the small-area device procedures. P2 and P3 scribing lines were patterned using a 355 nm picosecond laser scribing system (OpTek System, Inc., USA). The P2 lines (ca. 100  $\mu\text{m}$  wide) were implemented with an average laser power of 12 W and a pulse repetition frequency of 65 kHz. After deposition of the gold electrode, the P3 lines (ca. 80  $\mu\text{m}$  width) were patterned with an average laser power of 0.78 W and a pulse repetition frequency of 80 kHz. The distance interval between P1, P2, and P3 lines is ca. 30  $\mu\text{m}$ . The active area of 117.7  $\text{cm}^2$  was determined by calculating the difference between the shadow mask and the dead zone.

***Material characterization.*** The morphology of perovskite films was evaluated by field emission scanning electron microscopy (SEM, Hitachi, SU-8020) and atomic force microscopy (AFM, Bruker Dimension Icon instrument). X-ray photoelectron spectroscopy (XPS) was analyzed by ESCALAB 250, Al  $K\alpha$ , Thermo Fisher Scientific. Fourier transform infrared (FTIR) spectroscopy was obtained using a Bruker Vertex 70 infrared spectrophotometer (FTIR, Bruker VERTEX 70). Dynamic light scattering (DLS) was conducted on NanoBrook 90 Plusplas. ToF-SIMS measurement was performed on a PHI nanoTOF II instrument. Steady-state photoluminescence (PL) and time-resolved photoluminescence (TRPL) were measured using a PicoQuant FT-300 spectrometer, with a 510 nm laser. Micro-PL mapping was measured by a laser scanning confocal microscope (Enlitech, SPCM-1000) with a 470 nm pulse laser, in which the signal of area 625  $\mu\text{m}^2$  was collected. UV-visible absorption was performed with a UV-visible spectrometer (PerkinElmer UV-Lambda 950). Ultraviolet photoelectron spectroscopy (UPS) was carried out on a monochromatic He I light source (21.22 eV) and a VG Scienta R4000 analyzer. X-ray diffraction (XRD) measurements were conducted using a DX-2700BH diffractometer. The grazing incidence X-ray diffraction (GIXRD) tests were realized by using a high-resolution X-ray Diffractometer (Smartlab (9), Japan). Grazing incidence wide-angle scattering (GIWAXS) at an incidence angle of  $0.4^\circ$  was performed at BL17B1 beamline of Shanghai Synchrotron Radiation Facility (SSRF) using the X-ray energy of 10 KeV. The measurement conditions of *in-situ* UV-vis absorption and *in-situ* PL spectroscopies were described previously as reference<sup>16</sup>.

#### **Device characterization.**

The current density-voltage ( $J$ - $V$ ) characteristics of the devices were obtained by solar simulator equipment (Enlitech, SS-F5), and the illumination intensity (100  $\text{mW}\cdot\text{cm}^{-2}$ , AM 1.5G) was calibrated via a reference silicon cell with a KG5 filter. The scan range was from 1.5 V to 0 V with a 0.02 V bias step and 20 ms delay time. The external quantum efficiency (EQE) was characterized by a QE-R system (Enli Technology Co., Ltd.) using a 300-WXe lamp as the light source. The impedance spectroscopic measurements (EIS) and capacitance-voltage ( $C$ - $V$ ) measurements were measured

using the electrochemical workstation (IM6ex, Zahner, Germany) in dark conditions. Transient photocurrent (TPC) measurement was carried out with a Paios 4.0 instrument (FLUXiM AG, Switzerland).

### **Statistical Analysis**

All statistical analyses were performed with Origin 2023. The data obtained from J-V, XPS, FTIR, <sup>1</sup>H NMR, in situ PL, in situ UV-Vis, SEM, PL, PL mapping, UPS, C-V, MS and TPC were the original data. The other data were obtained by transferring the corresponding original data according to the calculation formula. Supporting information data including J-V, EQE, stabilized power output, UV-vis absorption, AFM, GIWAXs, GIXRD, UPS, dark I-V, XRD measurements, and certified reports for flexible module, and theoretical structures for DFT calculation.

### **DFT calculation**

The Vienna Ab Initio Simulation Package (VASP) was utilized to conduct density functional theory (DFT) computations under the generalized gradient approximation (GGA) employing the Perdew-BurkeErnzerhof (PBE) formulation.<sup>1</sup> The ionic cores were described using projected augmented wave (PAW) potentials, while valence electrons were incorporated using a plane wave basis set with a kinetic energy cutoff of 400 eV.<sup>2</sup> The FAPbI<sub>3</sub> (100) surface models containing 3×3×2 supercells were constructed in the slab structure with a vacuum layer thickness of 15 Å to isolate the surface slab from its periodic duplicates. The equilibrium lattice constant of the cubic FAPbI<sub>3</sub> unit cell was optimized to be a=6.404 Å. During structural optimizations, the  $\Gamma$  point grid was employed for Brillouin zone integration. Self-consistency of electronic energy was attained when the energy change fell below 10<sup>-5</sup> eV. Convergence of geometry optimization was achieved when the force change dropped below 0.02 eV/Å on each atom. The bottom stoichiometric layer was fixed to allow the top region to fully relax the FAPbI<sub>3</sub> crystal structure, including lattice parameters and internal atomic positions Grimme's DFT-D3 methodology was employed to account for dispersion interactions.<sup>3</sup> The adsorption energy ( $E_{ads}$ ) of additive was defined as  $E_{ads} = E_{additive+surf} - E_{surf} - E_{additive}$ , where  $E_{additive+surf}$ ,  $E_{surf}$ , and  $E_{additive}$  are the energy of additive adsorbed on the surface.

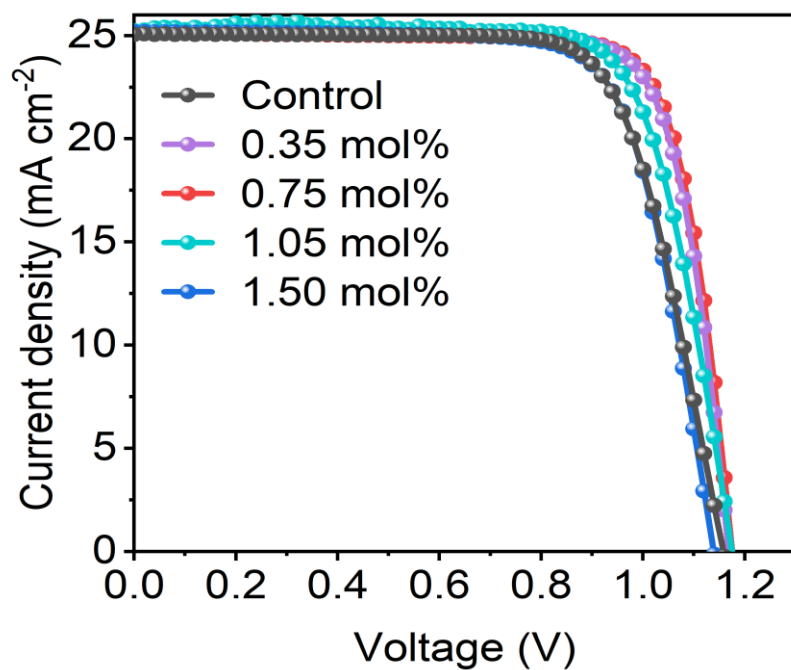

**Figure S1.**  $J$ - $V$  curves of the champion rigid PSCs based on BPySCN under different injection concentrations.

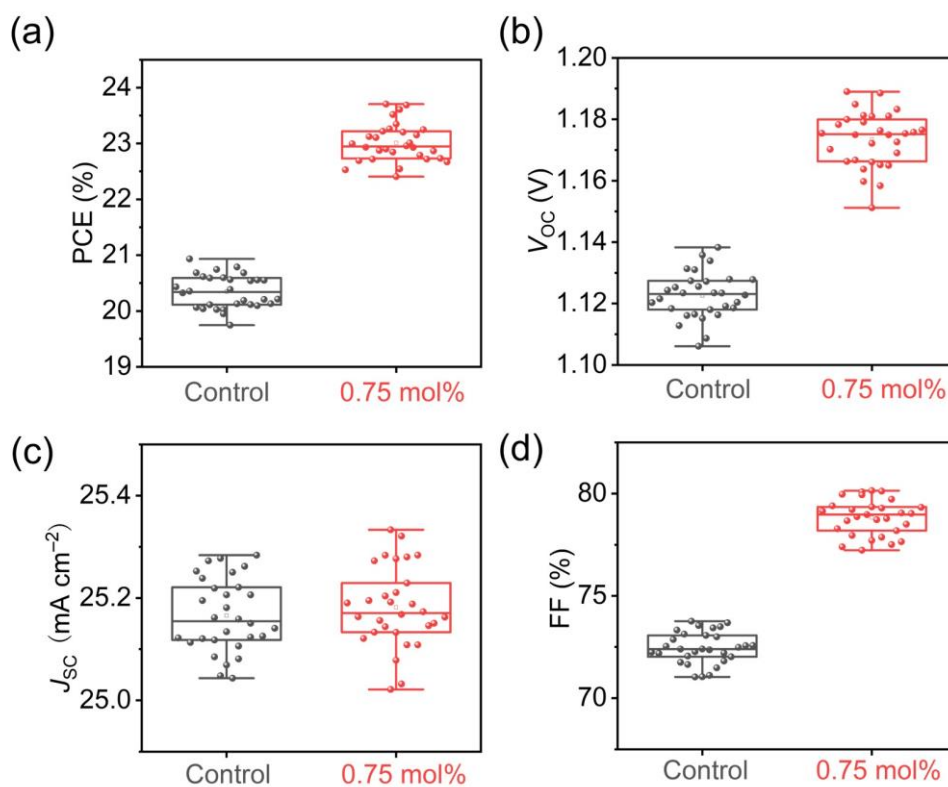

**Figure S2.** Statistical distribution of photovoltaic parameters of 30 individual devices in each case.

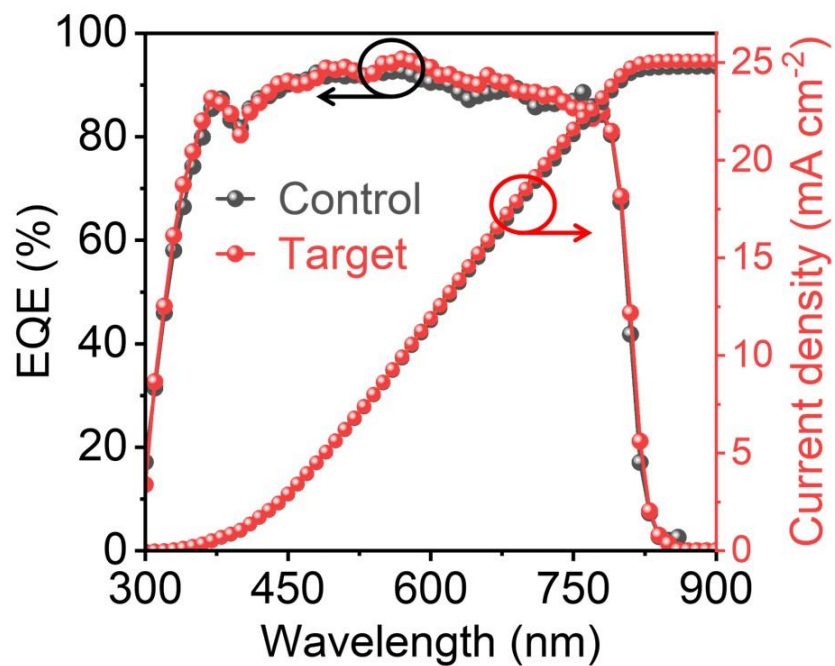

**Figure S3.** EQE curves and the corresponding integrated current density of champion rigid PSCs.

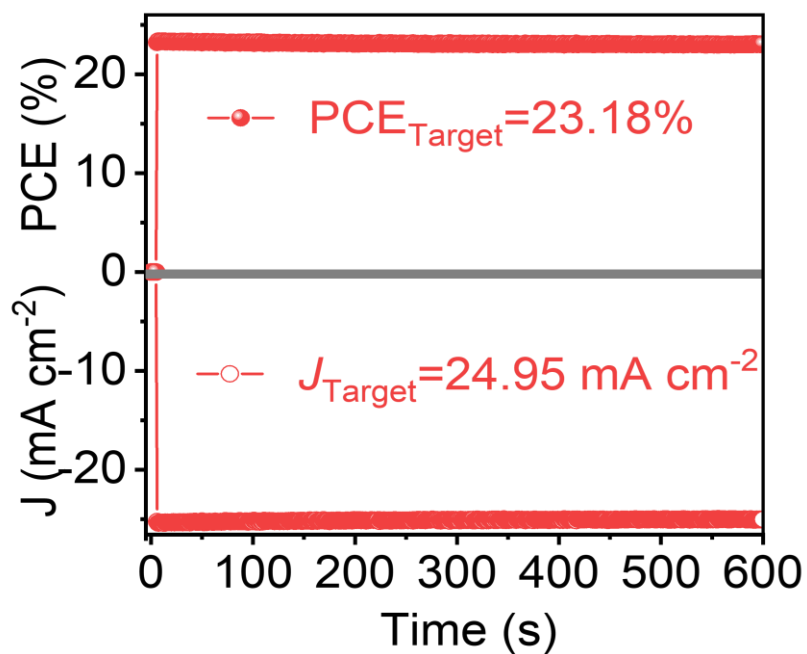

**Figure S4.** Stabilized power output of BPySCN-based champion rigid device measured at a fixed maximum power point (MPP) voltage as a function of time.

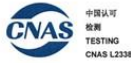

# TEST REPORT

Report No: PWQC-WT-P23101822-4R

**Sample Name :** Photovoltaic cell  
 Dalian Institute of Chemical Physics, CAS

**Client :** Shanxi Normal University  
 Xidian University  
 No.457 Zhongshan Road, Dalian, Liaoning, China

**Client Address :** No.620 West Chang'an Avenue, Chang'an District, Xi'an, Shaanxi, China  
 No.2, Taibai South Road, Xi'an, Shaanxi, China

**Type of Project :** Consignation

PHOTOVOLTAIC AND WIND POWER SYSTEMS QUALITY TEST CENTER, IEE, CHINESE ACADEMY OF SCIENCES  
 October, 20, 2023

PHOTOVOLTAIC AND WIND POWER SYSTEMS QUALITY TEST CENTER, IEE, CHINESE ACADEMY OF SCIENCES

Report No: PWQC-WT-P23101822-4R

|                 |                                                                       |
|-----------------|-----------------------------------------------------------------------|
| Sample code     | DC2023a092                                                            |
| Sample s/n      | 2                                                                     |
| Type            | 1.05g Flexible Perovskite Solar Cell Module                           |
| Designated area | 117 cm <sup>2</sup><br>The designated area was offered by the client. |

|                                                                                                                                     |                                                             |                           |         |                    |                 |
|-------------------------------------------------------------------------------------------------------------------------------------|-------------------------------------------------------------|---------------------------|---------|--------------------|-----------------|
| Items of testing                                                                                                                    | Measurement of photovoltaic current-voltage characteristics |                           |         |                    |                 |
| Sample code                                                                                                                         | DC2023a092                                                  |                           |         |                    |                 |
| Results                                                                                                                             | Isc (mA)                                                    | Jsc (mA/cm <sup>2</sup> ) | Voc (V) | Pm (mW)            | File            |
|                                                                                                                                     | 81.831                                                      | 0.699                     | 31.820  | 1790.629           |                 |
|                                                                                                                                     | Ipm (mA)                                                    | Vpm (V)                   | FF (%)  | E <sub>r</sub> (%) | A20231018115646 |
|                                                                                                                                     | 71.799                                                      | 24.939                    | 68.77   | 15.30              |                 |
| Measurement uncertainty:<br>U <sub>95(Isc)</sub> =1.9% (k=2)<br>U <sub>95(Voc)</sub> =1.8% (k=2)<br>U <sub>95(Pm)</sub> =2.5% (k=2) |                                                             |                           |         |                    |                 |

PHOTOVOLTAIC AND WIND POWER SYSTEMS QUALITY TEST CENTER, IEE, CHINESE ACADEMY OF SCIENCES

Report No: PWQC-WT-P23101822-4R

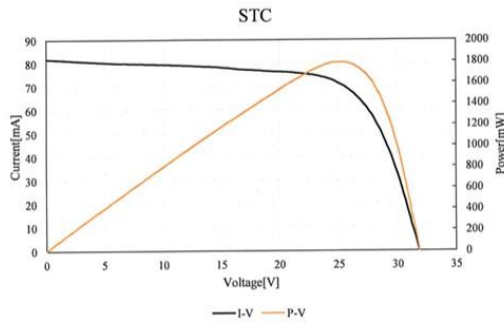

|                |                                             |
|----------------|---------------------------------------------|
| Type           | 1.05g Flexible Perovskite Solar Cell Module |
| Ser.No         | DC2023a092                                  |
| Area           | 117.00 cm <sup>2</sup>                      |
| Isc            | 81.831 mA                                   |
| Jsc            | 0.699 mA/cm <sup>2</sup>                    |
| Voc            | 31.820 V                                    |
| FF             | 68.77 %                                     |
| Pm             | 1790.629 mW                                 |
| E <sub>r</sub> | 15.30 %                                     |
| Ipm            | 71.799 mA                                   |
| Vpm            | 24.939 V                                    |
| Voltage Sweep  | Reverse                                     |
| Sweep time     | 17.96 s                                     |
| Temp           | 25 °C                                       |
| Irr            | 100 mW/cm <sup>2</sup>                      |
| File           | A20231018115646                             |

— End of Report —

**Figure S5.** Certified reports for the 117.0 cm<sup>2</sup> flexible perovskite solar module by Chinese photovoltaic and Wind Power Systems Quality Test Center (PWQTC, China).

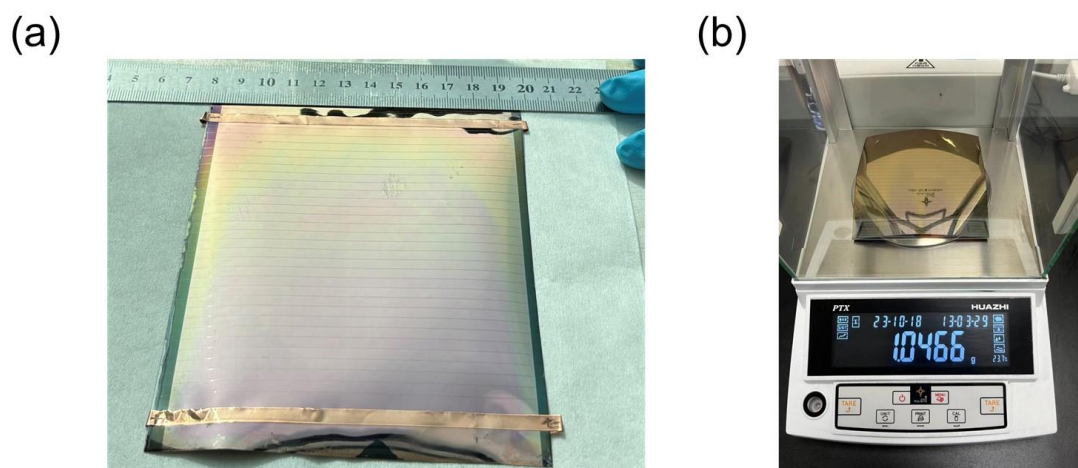

**Figure S6.** (a) Photograph of flexible perovskite solar module. (b) Self-tested weighting results of flexible solar module.

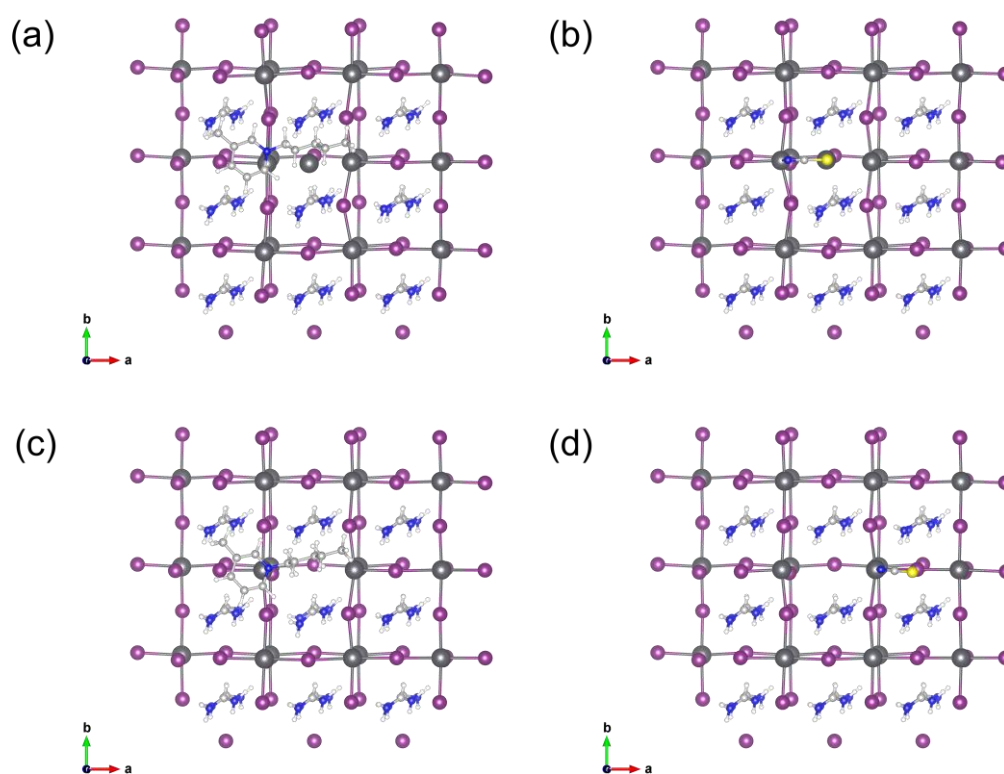

**Figure S7.** (a-b) Theoretical structures of  $\text{BPy}^+$  (a) and  $\text{SCN}^-$  (b) adsorbed on the  $\text{PbI}_2$ -terminated perovskite (100) plane with  $\text{Pb}_I$  antisite defects. (c-d) Theoretical structure of  $\text{BPy}^+$  (c) and  $\text{SCN}^-$  (d) adsorbed on the  $\text{PbI}_2$ -terminated perovskite (100) plane with  $\text{V}_I$  defects.



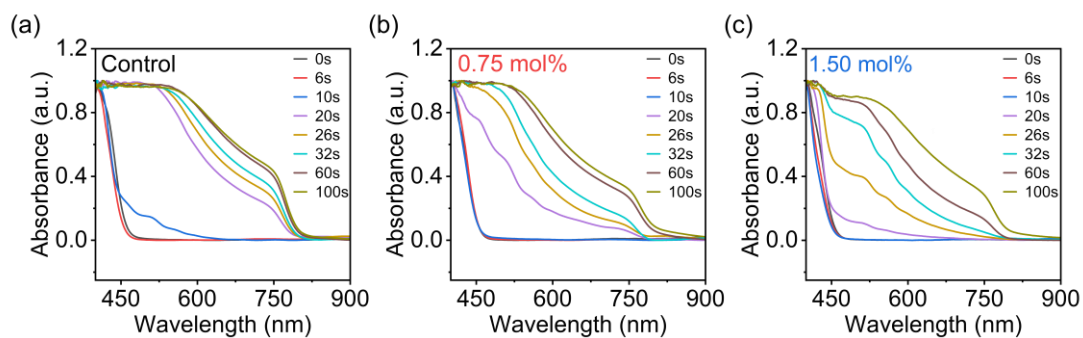

**Figure S8.** Evolution of the absorption spectra of perovskite films with the increased BPySCN concentrations from (a) 0 to (b) 0.75 and (c) 1.50 mol%.

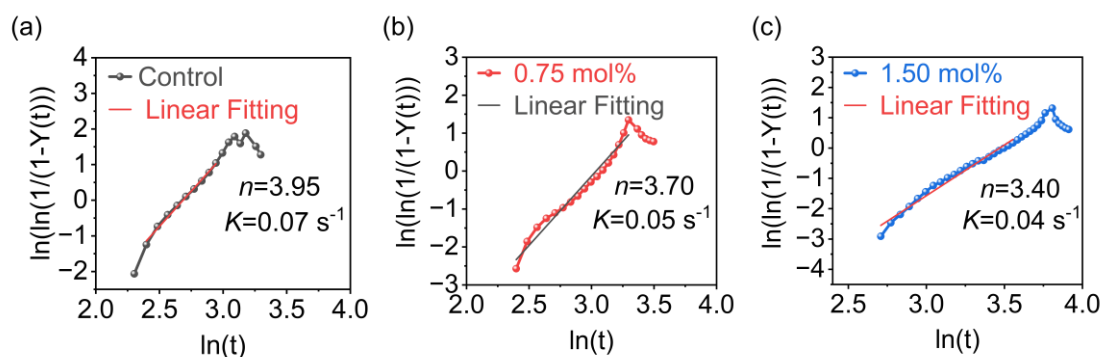

**Figure S9.** Linear fitting for the  $\ln(-\ln(1-Y(t)))$  versus  $\ln(t)$  plot of perovskite films with the increased BPySCN concentrations from (a) 0 to (b) 0.75 and (c) 1.50 mol%. to determine the dimensionality ( $n$ ) and rate constant ( $K$ ).

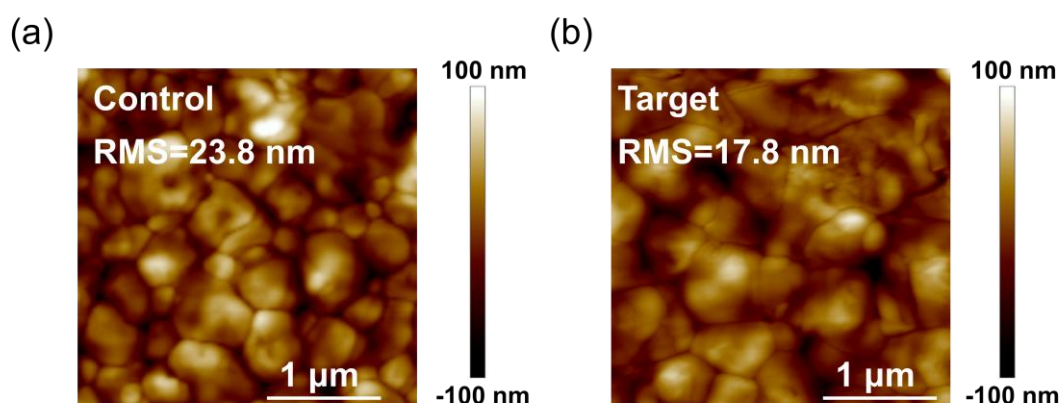

**Figure S10:** AFM topography images of the control (a) and target (b) films, showing the root-mean-square roughness (RMS).

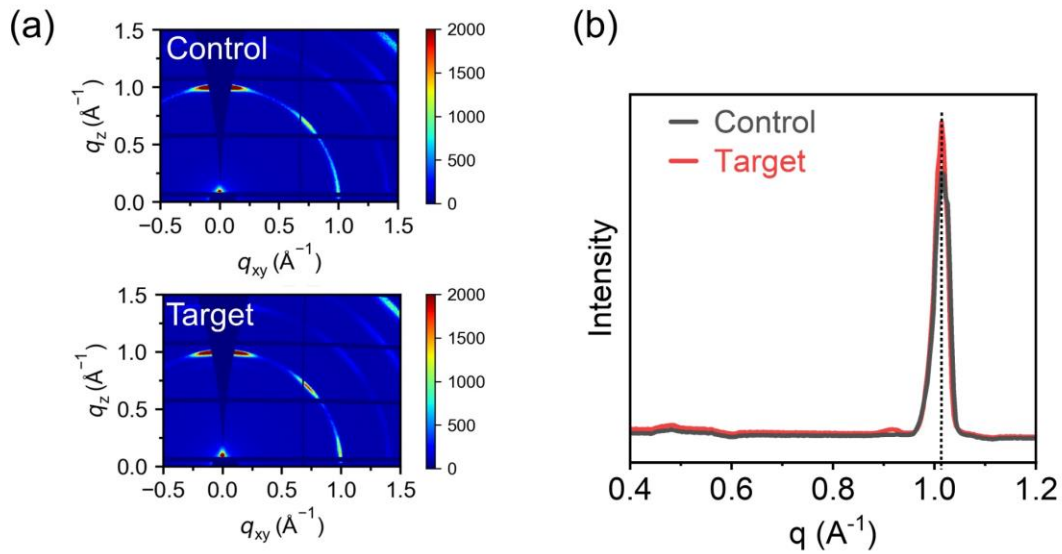

**Figure S11.** (a) 2D-GIWAXS patterns of control and target films and (b) corresponding line-cut profiles extracted from GIWAXS patterns.

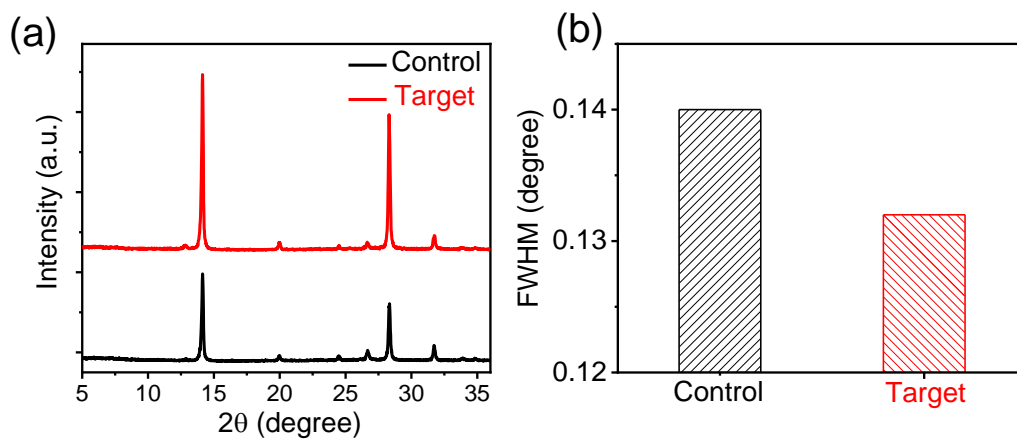

**Figure S12.** (a) XRD patterns and (b) FWHM values for different perovskite films.

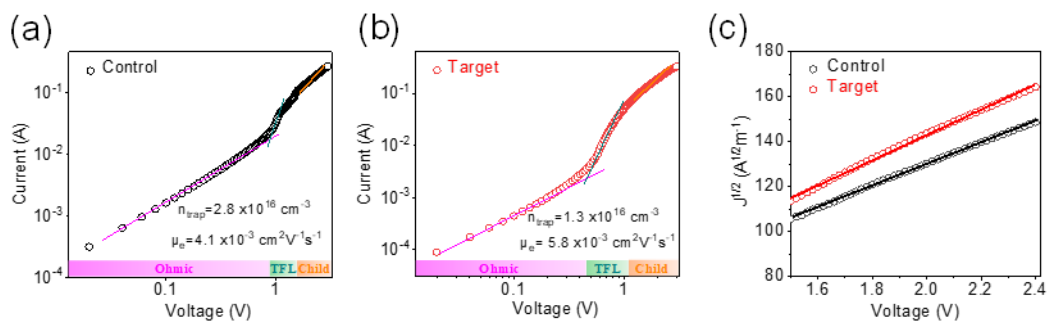

**Figure S13.** (a-b) Dark  $I$ - $V$  behaviors of electron-only devices (ITO/SnO<sub>2</sub>/perovskite/PCBM/Ag) showing different regimes as function of voltage bias. (c) The  $J^{1/2}$  versus  $V$  plots extracted from the child region in dark  $I$ - $V$  curves.

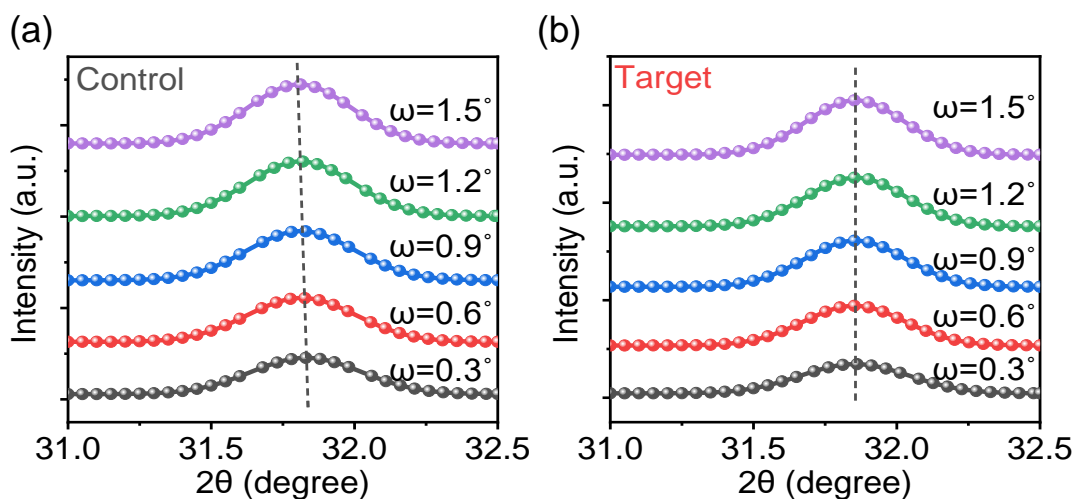

**Figure S14.** Line cuts of the GIXRD patterns of the control (a) and target (b) perovskite films.

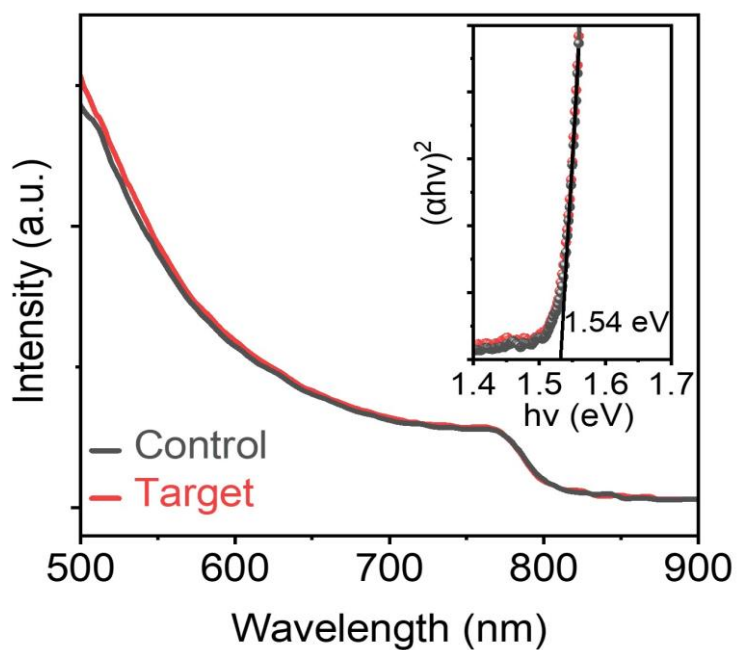

**Figure S15.** UV-vis absorption spectra of perovskite films with the corresponding Tauc plots shown inset.

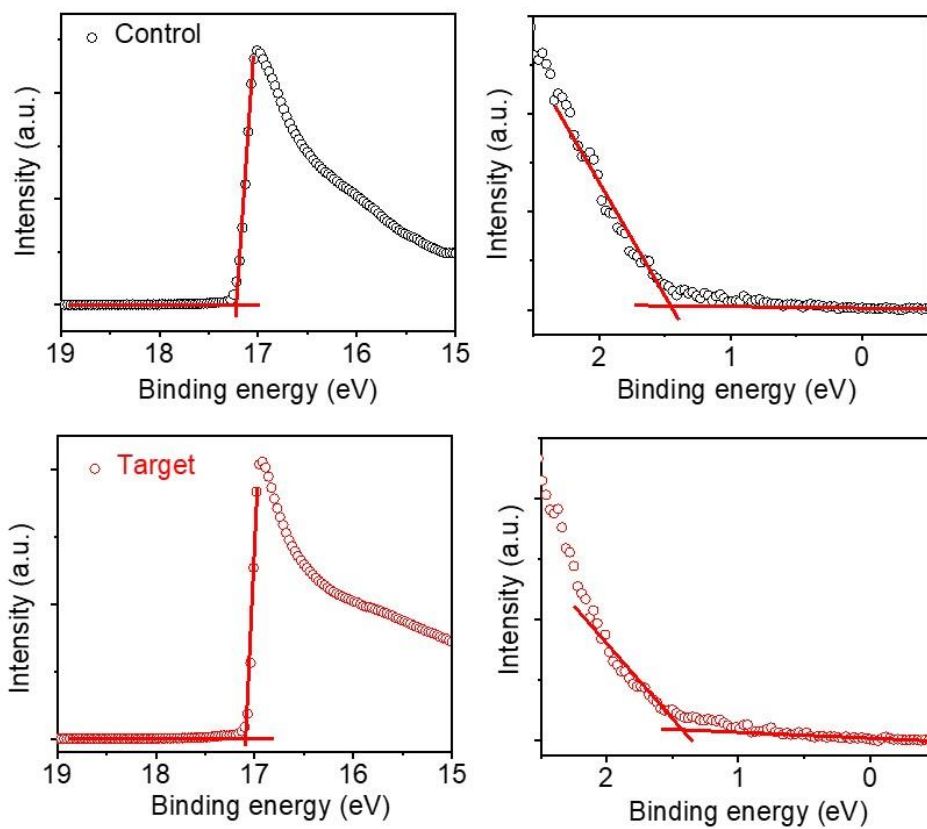

**Figure S16.** UPS spectra of control and target perovskite films, showing the (a)  $E_{\text{Cutoff}}$  level and (b) the value of  $E_{\text{Fermi edge}}$ .

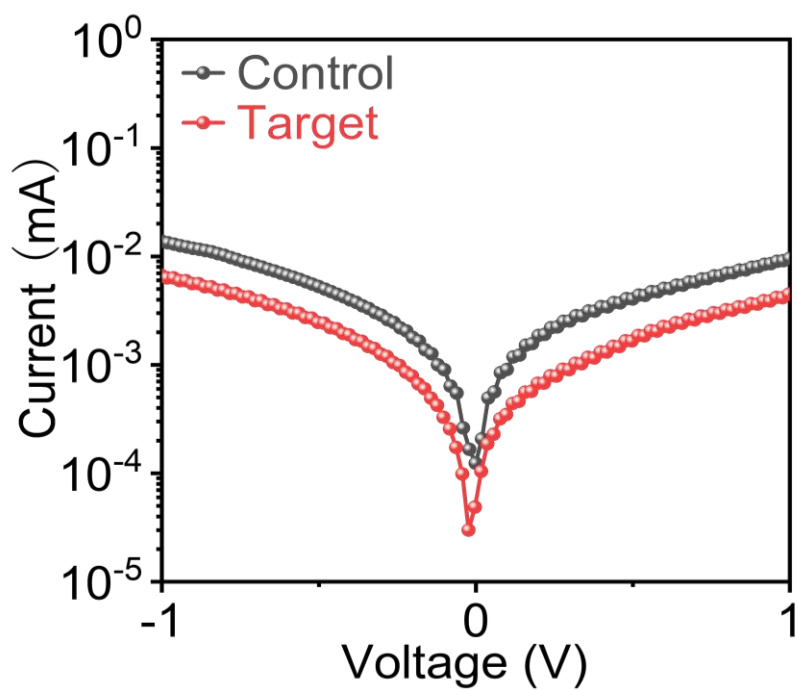

**Figure S17.** Dark  $I$ - $V$  curves for the control and target devices.

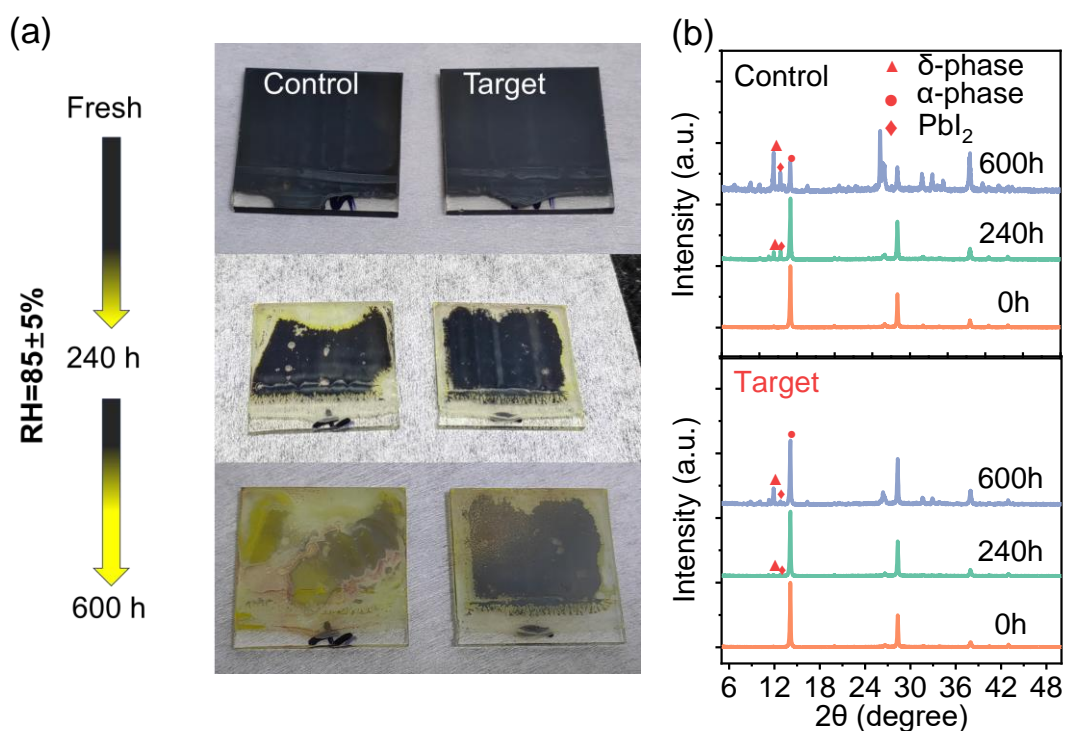

**Figure S18.** Photographs (a) and XRD patterns (b) of the control and target perovskite films as function of aging time under ambient conditions at  $85\pm 5\%$  relative humidity.

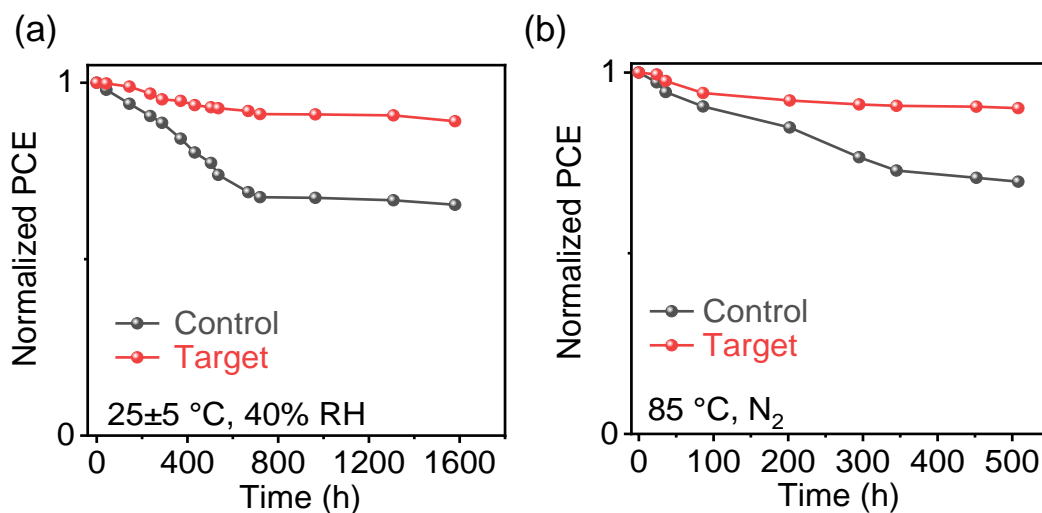

**Figure S19.** (a) Comparison of environmental stability of the unencapsulated flexible PSCs exposed to the ambient environment with ca. 40% humidity at room temperature. (b) Comparison of thermal stability of unencapsulated flexible PSCs under continuous  $85\text{ }^\circ\text{C}$  heating in N<sub>2</sub> atmosphere.

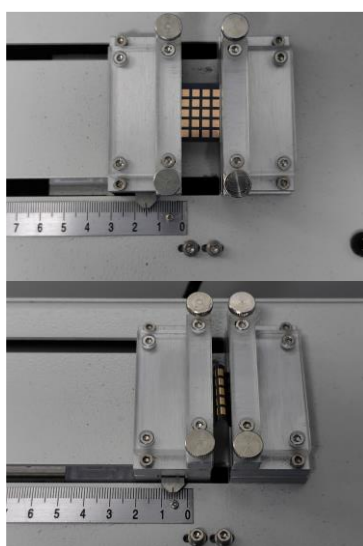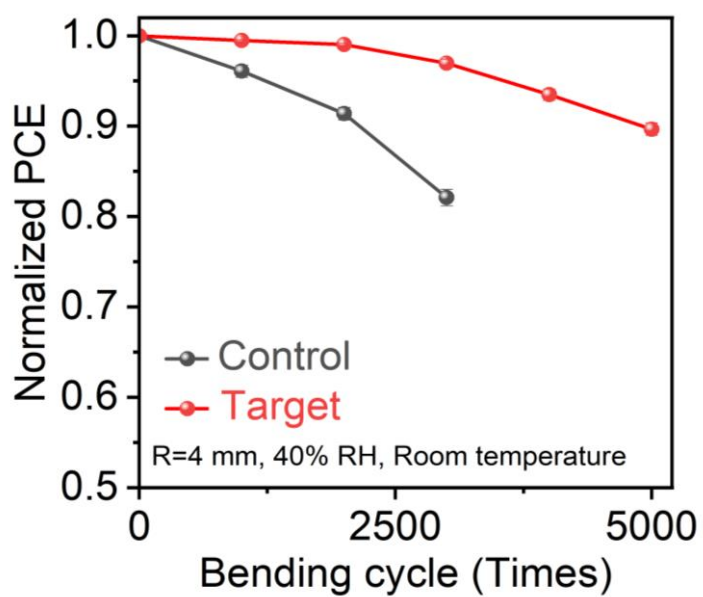

**Figure S20.** Comparison of mechanical stability of the unencapsulated F-PSCs under multiple-cycle bending test with a curvature radius ( $R$ ) of 4 mm in air condition (ca. 40% humidity and room temperature).

**Table S1.** Summary of the photovoltaic parameters of rigid PSCs under different BPySCN incorporation concentrations.

|            | $V_{oc}$<br>(V) | $J_{sc}$<br>(mA cm <sup>-2</sup> ) | FF<br>(%) | PCE<br>(%) |
|------------|-----------------|------------------------------------|-----------|------------|
| Control    | 1.16            | 25.05                              | 73.3      | 21.27      |
| 0.45 mol % | 1.17            | 25.11                              | 78.8      | 23.12      |
| 0.75 mol % | 1.18            | 25.14                              | 80.1      | 23.70      |
| 1.05 mol % | 1.17            | 25.22                              | 75.4      | 22.34      |
| 1.50 mol%  | 1.14            | 25.19                              | 74.1      | 21.25      |

**Table S2.** Photovoltaic parameters and hysteresis index for the rigid PSCs.

|         | Scanning<br>mode | $V_{oc}$<br>(V) | $J_{sc}$<br>(mA cm <sup>-2</sup> ) | FF<br>(%) | PCE<br>(%) | Hysteresis<br>Index (%) |
|---------|------------------|-----------------|------------------------------------|-----------|------------|-------------------------|
| Control | Reverse          | 1.14            | 25.08                              | 73.8      | 21.26      | 3.3                     |
|         | Forward          | 1.12            | 25.05                              | 72.5      | 20.57      |                         |
| Target  | Reverse          | 1.18            | 25.14                              | 80.1      | 23.70      | 1.3                     |
|         | Forward          | 1.16            | 25.21                              | 79.8      | 23.40      |                         |

**Table S3.** Photovoltaic parameters for the control and target F-PSCs.

| F-PSCs  | $V_{oc}$<br>(V) | $J_{sc}$<br>(mA cm <sup>-2</sup> ) | FF<br>(%) | PCE<br>(%) |
|---------|-----------------|------------------------------------|-----------|------------|
| Control | 1.13            | 24.53                              | 75.7      | 20.98      |
| Target  | 1.16            | 24.85                              | 79.9      | 23.01      |

**Table S4.** Photovoltaic parameters for the flexible perovskite solar module.

| Flexible solar<br>modules | $V_{oc}$<br>(V) | $J_{sc}$<br>(mA cm <sup>-2</sup> ) | FF<br>(%) | PCE<br>(%) | Pmax<br>(mW) | Active<br>area<br>(cm <sup>2</sup> ) | Power<br>density<br>(W/kg) |
|---------------------------|-----------------|------------------------------------|-----------|------------|--------------|--------------------------------------|----------------------------|
| Self-tested               | 32.49           | 0.69                               | 78.5      | 17.52      | 2061.7       | 117.7                                | 1969.1                     |
| Certified                 | 31.82           | 0.69                               | 71.8      | 15.30      | 1790.6       | 117.0                                | 1705.3                     |

**Table S5.** Summary of the specific power and corresponding active area of flexible solar cells technologies.

| Photovoltaic technology          | Specific power<br>(W g <sup>-1</sup> ) | Active area<br>(cm <sup>2</sup> ) | Reference        |
|----------------------------------|----------------------------------------|-----------------------------------|------------------|
| F-PSCs                           | 1.96                                   | 0.1                               | 4                |
| F-PSCs                           | 4.16                                   | 0.09                              | 5                |
| F-PSCs                           | 23.26                                  | 0.06                              | 6                |
| F-PSCs                           | 26.9                                   | 0.1                               | 7                |
| F-PSCs                           | 29.4                                   | 0.17                              | 8                |
| F-PSCs                           | 23                                     | 1                                 | 9                |
| F-PSCs                           | 35                                     | 1                                 | 10               |
| Flexible silicon solar module    | 1.9                                    | 274.4                             | 11               |
| Flexible perovskite solar module | 1.97                                   | 117.7                             | <b>This work</b> |

**Table S6.** Fitting parameters for TRPL spectra of different perovskite films.

|         | A <sub>1</sub> | τ <sub>1</sub> (ns) | A <sub>2</sub> | τ <sub>2</sub> (ns) | τ <sub>ave</sub> (ns) |
|---------|----------------|---------------------|----------------|---------------------|-----------------------|
| Control | 83.3%          | 382.8               | 16.7%          | 90.1                | 333.8                 |
| Target  | 56.0%          | 860.0               | 44.0%          | 242.2               | 588.0                 |

**Table S7.** Summaries of series resistance (R<sub>s</sub>), transport resistance (R<sub>tr</sub>) and recombination resistance (R<sub>rec</sub>) obtained from electrical impedance spectroscopy (EIS) for different devices.

|         | R <sub>s</sub><br>(Ω) | R <sub>tr</sub><br>(Ω) | R <sub>rec</sub><br>(Ω) | C <sub>tr</sub><br>(F cm <sup>-2</sup> ) | C <sub>rec</sub><br>(F cm <sup>-2</sup> ) |
|---------|-----------------------|------------------------|-------------------------|------------------------------------------|-------------------------------------------|
| Control | 46.3                  | 546.3                  | 3268.1                  | 1.33×10 <sup>-8</sup>                    | 1.68×10 <sup>-8</sup>                     |
| Target  | 21.8                  | 533.2                  | 7791.0                  | 2.97×10 <sup>-8</sup>                    | 1.16×10 <sup>-8</sup>                     |



## Reference:

1. G. Kresse, J. Furthmüller, *Computational Materials Science* 1996, 6, 15.
2. G. Kresse, D. Joubert, *Phys. Rev. B* 1999, 59, 1758.
3. S. Grimme, J. Antony, S. Ehrlich, H. Krieg, *The Journal of Chemical Physics* 2010, 132, 154104.
4. Y. Li, L. Meng, Y. Yang, G. Xu, Z. Hong, Q. Chen, J. You, G. Li, Y. Yang, Y. Li, *Nat Commun.* 2016, 7, 10214.
5. M. Xie, J. Wang, J. Kang, L. Zhang, X. Sun, K. Han, Q. Luo, J. Lin, L. Shi, C.-Q. Ma, *Flex. Print. Electron.* 2019, 4, 034002.
6. H. Zhang, J. Cheng, D. Li, F. Lin, J. Mao, C. Liang, A. K.-Y. Jen, M. Grätzel, W. C. H. Choy, *Adv. Mater.* 2017, 29, 1604695.
7. Q. Wang, C.-C. Chueh, T. Zhao, J. Cheng, M. Eslamian, W. C. H. Choy, A. K.-Y. Jen, *ChemSusChem* 2017, 10, 3794.
8. S. Kang, J. Jeong, S. Cho, Y. J. Yoon, S. Park, S. Lim, J. Y. Kim, H. Ko, *J. Mater. Chem. A* 2019, 7, 1107.
9. B. Hailegnaw, S. Demchyshyn, C. Putz, L. E. Lehner, F. Mayr, D. Schiller, R. Pruckner, M. Cobet, D. Ziss, T. M. Krieger, A. Rastelli, N. S. Sariciftci, M. C. Scharber, M. Kaltenbrunner, *Nat Energy* 2024, 18, 379-387.
10. M. Kaltenbrunner, G. Adam, E. D. Głowacki, M. Drack, R. Schwödiauer, L. Leonat, D. H. Apaydin, H. Groiss, M. C. Scharber, M. S. White, N. S. Sariciftci, S. Bauer, *Nature Mater* 2015, 14, 1032.
11. Y. Li, X. Ru, M. Yang, Y. Zheng, S. Yin, C. Hong, F. Peng, M. Qu, C. Xue, J. Lu, L. Fang, C. Su, D. Chen, J. Xu, C. Yan, Z. Li, X. Xu, Z. Shao, *Nature* 2024, 626, 105.
